# Supplementary material for: The histology of human right atrial tissue in patients with high-risk Obstructive Sleep Apnea and underlying cardiovascular disease: A pilot study
Source: PubMed Central journal article supplement — Int J Cardiol Heart Vasc. 2015 Jan 21;6:71–5. doi: 10.1016/j.ijcha.2015.01.008 (PMC5497175; doi:10.1016/j.ijcha.2015.01.008), 2015-01-21
Supplement: mmc1.pdf [file mmc1.pdf]

---

## Modified Berlin Questionnaire

Name / Patient Number: \_\_\_\_\_

Height (m) \_\_\_\_\_ Weight (kg) \_\_\_\_\_ Age \_\_\_\_\_ Male / Female

*Please check the response that most correctly applies to you:*

---

### PART 1

1. Have you been diagnosed with Sleep Apnea?

- Yes       No

*If No, stop here and move to Part 2.*

2. Do you use C-PAP?

- Yes       No

3. How often do you use C-PAP?

- Every night     Every other night  
 Twice a week    Never
- 

4. Do you use any other device for treating Sleep Apnea (B-PAP, oral devices, etc)

- Yes:       No

If Yes, which one? \_\_\_\_\_

5. Do you use any medication for treating Sleep Apnea

- Yes       No
- 

### PART 2

#### Category 1

1. Do you snore?

- a. Yes  
 b. No  
 c. Don't know

*If you snore:*

2. Your snoring is:

- a. Slightly louder than breathing  
 b. As loud as talking  
 c. Louder than talking  
 Very loud – can be heard in adjacent rooms

3. How often do you snore

- a. Nearly every day  
 b. 3-4 times a week  
 c. 1-2 times a week  
 d. 1-2 times a month  
 e. Never or nearly never

4. Has your snoring ever bothered other people?

- a. Yes  
 b. No  
 c. Don't know

5. Has anyone noticed that you quit breathing during your sleep?

- a. Nearly every day  
 b. 3-4 times a week  
 c. 1-2 times a week  
 d. 1-2 times a month  
 e. Never or nearly never

#### Category 2

6. How often do you feel tired or fatigued after your sleep?

- a. Nearly every day  
 b. 3-4 times a week  
 c. 1-2 times a week  
 d. 1-2 times a month  
 e. Never or nearly never

7. During your waking time, do you feel tired, fatigued, or not up to par?

- a. Nearly every day  
 b. 3-4 times a week  
 c. 1-2 times a week  
 d. 1-2 times a month  
 e. Never or nearly never

8. Have you ever nodded off or fallen asleep while driving a vehicle?

- a. Yes  
 b. No

*If Yes:*

9. How often does this occur?

- a. Nearly every day  
 b. 3-4 times a week  
 c. 1-2 times a week  
 d. 1-2 times a month  
 e. Never or nearly never

#### Category 3

10. Do you have high blood pressure?

- a. Yes  
 b. No  
 c. Don't know

11. BMI (kg/m<sup>2</sup>) \_\_\_\_\_

---
